## New Diplomates, American Board of Anesthesiology®, Fall 2007

|                         |                        |                        |                       |                        |
|-------------------------|------------------------|------------------------|-----------------------|------------------------|
| Matthew Abrahams        | Roland Brusseau        | Niloufar Elhya         | Timothy Harpur        | Elizabeth Krenz        |
| Ayman Ads               | Stefan Budac           | Khallad El-Mohtar      | Bryan Harris          | Justin Krueer          |
| Justin Ahlman           | Noah Bunker            | Vance Elshire          | Michael Haske         | Malabika Kulkarni      |
| Khalid Ahmad            | Chante Buntin          | Nasr Enany             | Melinda Hayes         | Kiran Kuna             |
| Jane Ahn                | Krisdha Buranapiyawong | Jennifer Engstrom      | W. Kate Heberle       | Sanjay Kurichh         |
| Reginald Ajakwe         | Barbara Burke          | Edson Erkulvrawatr     | Jesse Hebert          | Bradley Labenz         |
| Asmik Akopyan           | Todd Burmeister        | Amaechi Erondu         | Mohammad Helwani      | Vimal Lala             |
| Mohammed Alam           | Talitha Burns          | Alejandro Escobar      | Andrea Henley-Seymour | Richard Lambert        |
| Mark Alcidi             | Juliet Burry           | Adeline Essien         | Raul Hernandez        | Katharine Lamperti     |
| Iulia Constanta         | Catherine Burton       | William Evans          | David Higgins         | Christopher Lancaster  |
| Alexandreaunu           | Nyles Burton           | Michael Evers          | Eric High             | Nakeisha Landry-Boyd   |
| Yazmin Alfonso          | Jennifer Bush          | Stephanie Fabiani      | John Hill, Jr.        | Elizabeth Lane         |
| Diana Alizadeh          | Alberto Cabantog       | Jason Falterman        | Ayesa Hilvano         | Todd Lasher            |
| Estibaliz Alomar-Melero | Adriana Caldeira       | Gary Fan               | Thomas Hirth          | Howard Lau             |
| Jean Amazan             | Vicki Callahan         | Andrea Ference         | Shawn Holden          | Ann Lawrence           |
| Aparna Ananth           | David Camp             | Antonio Fernandez      | Eric Holley           | Gregory Lawrence       |
| Jennifer Anderson       | Scott Campbell         | Gregory Filatoff       | Christopher Holst     | David Layer            |
| Sean Anderson           | Jael Carbajal          | Mariana Fishman        | Richard Hong          | Howard Lazar           |
| Louis Andrews           | Paul Carrell           | James Flowerdew        | Ryan Hope             | Bradley Leatherwood    |
| Robert Andrews          | Victor Carrion-Zamora  | Benjamin Fogelman      | Scott Horn            | Blake Leche            |
| Tiffany Angelo          | Phillip Carroll        | Alexander Forowycz     | John Hsu              | Courtney Leddell       |
| Stephen Aniskevich, III | Luigi Cassetta         | Nicholas Franceschini  | Sheree Hsu            | Seung Lee              |
| Gregory Applegate       | Peter Castro           | David Francis          | Huchun Hu             | Simon Lee              |
| Rae Aranas              | Conrad Cean            | Lawrence Franowicz     | Yuwen Hu              | Tammy Lee              |
| Erick Arbenz            | Babajan Chalabi        | Robert Frey            | Eugene Huang          | Kenneth Leng           |
| Francois Archambault    | Calvin Chan            | Paul Fronapfel         | Jiapeng Huang         | Adam Lesser            |
| Gregory Arnold          | Do Chan                | Chiawan Fu             | Arlene Hudson         | Samson Leung           |
| Bassem Asaad            | Quentin Chan           | Patrick Fujimoto       | William Hudson        | Darren Leverenz        |
| Kelly Asan              | William Chang          | Tracy Fuller           | Steven Huffman        | Jay Levin              |
| Andrew Assiamah         | Jasper Chen            | Brandon Gaetano        | Quinn Hume            | Eryn Levis             |
| David Atkinson          | Zhenhuan Chen          | Thomas Gaffey          | Steven Hunnell        | Nathan Lewis           |
| Jennifer Aunspaugh      | James Chien            | Carolyn Galiza         | Robert Hurley         | Hanzhou Lian           |
| Chiwing Auyeung         | Seshendra Chirumamilla | Natalie Ganceres       | Kiki Hurt             | Wayne Liang            |
| Syed Azim               | Christopher Choi       | Artee Gandhi           | Raziuddin Hussaini    | Adam Likavec           |
| Stephen Bader           | Hoon Choi              | Matthew Garced         | Larry Hutson, Jr.     | Yi Lin                 |
| Rebecca Bagdonas        | Ji-Eun Choi            | Scott Gardiner         | Eutiquio Imperial     | Philip Linas           |
| Masoumeh Bahmani        | Bruce Chou             | Rajeev Garg            | Mark Indelicato       | Scott Lindberg         |
| Wilmer Balaoing         | Clint Christensen      | James Garofalo         | Maria Inton-Santos    | Zachary Lipman         |
| Ron Banister            | Jerry Chu              | George Garza           | Christine Irelan      | Michael Liu            |
| David Barclay           | Peter Chu              | Jason Gatling          | Benito Irizarry       | Daniel Loder           |
| Mark Barcohana          | Kenneth Chua           | Sergey Georgiyevskiy   | George Istaphanous    | Vanessa Loland         |
| Efren Baria             | Brian Chung            | Joseph Ghahhari        | James Jacob           | Manuel Longo           |
| Joseph Barrows          | Jonathan Claassen      | Kamel Ghandour         | Shahram Jalali        | Brian Lopp             |
| Ignat Bashkirov         | Amy Clark              | Talal Ghazal           | Tanyu Jelev           | Daniel Lorenzo, Jr.    |
| Manal Basilious         | Eric Clary             | Greg Ghiardi           | Thomas Jerabek        | Lee Eric Lorico        |
| Nathan Bay              | Samuel Clowney         | Mariam Ghobriel        | Emily Joe             | Danielle Ludwin        |
| Ryan Beall              | Franklin Cofresi       | Koushik Ghosh          | Craig Johnston        | Thomas Luisetti        |
| James Beckham           | David Coggeshall       | Babuk Ghuman           | Taylor Johnston       | Kelly Ly               |
| Anthony Benick          | Jonathan Cohen         | Sukhwinder Gill        | Robert Jones          | Larry Mabine           |
| Abd Alrahman Benni      | Anthony Colantonio     | Neil Gillespie         | Steven Jones          | Rene Macias-Rodriguez  |
| Cheri Berg              | Karl Coloma            | David Glatt            | Nirmal Joseph         | Mark Macknet           |
| David Berman            | John Coloma            | Jeffrey Gonzales       | Edin Jusufbegovic     | Brenda MacKnight       |
| Alejandro Bernot        | Joshua Constable       | Bhaskar Gopalakrishnan | Clinton Kakazu        | Esteban Magana         |
| Joshua Berris           | Jeffrey Conway         | Manuel Gorrin Rivas    | Jondi Kakuberi        | Rinki Mahay            |
| Raafat Beshara          | Marco Corridore        | Ankur Gosalia          | Asha Kale             | Kinlap Mak             |
| Mulki Bhat              | Joseph Creo            | Niels Gothgen          | Heather Kalejs        | Savita Manglik         |
| Vaishali Bhavsar        | Melanie Cross          | Peter Gougov           | Akos Kalmar           | David Mann             |
| Ravneet Biring          | Christopher Cuciti     | Gerald Grass           | Sherif Kandil         | Noor Mansoori          |
| James Bisping           | Jeremy Curry           | Carrie Greenberg       | Jonathan Katz         | Nicholas Mantel        |
| Will Blankenship        | Barry Dale             | Erin Griffith          | Michael Kaufman       | Julius Mapalad         |
| Sam Blankson-Hemans     | James Darling, II      | Mark Grim              | John Kearney          | Donald Mardis, III     |
| Oksana Bogatryyova      | Jason Daume            | Eric Grossman          | LaTaya Keene          | Robert Marshall, III   |
| Keith Boldon            | Christopher Davis      | Theron Grover          | Andrew Kennedy        | Paul Martin            |
| Bhupinder Bolla         | Jodi Dayton            | Jan Gruber             | Rizwan Khan           | Shannon Martin         |
| Joshua Bonsell          | Benjamin Deaton        | Jonathon Gruncich      | Nazeer Khanani        | Juan Marusich          |
| Keley Booth             | Carrie Decker          | Ashraf Guindi          | Jill Kilkelly         | Phillip Marzolino, Jr. |
| Josif Borovic           | James Dellaripa        | Amitabh Gulati         | Jerry Kim             | Cori Mason             |
| Ryan Bortolon           | Brandon Dial           | Ramiro Gumucio         | Michael Kim           | Maziar Massrouf        |
| Demetrios Bourdakos     | Jaime Diaz-Borges      | Steven Guon            | Scott King            | Parag Mathur           |
| Nader Boushra           | Heath Diel             | Anjali Karen Hack      | Charles Kiser         | Vineesh Mathur         |
| Scott Brancolini        | Marc Donahue           | James Hackett, II      | Andrea Klein          | Linka Matos            |
| Brian Bravenec          | Christopher Dow        | Nathan Hahn            | Karin Klika           | Joanna Matyska         |
| Brandon Bregman         | Anthony Dragovich      | Jeffrey Hambleton      | William Ko            | Cory Matz              |
| Andrew Brewer           | Morris Dressler        | Amy Hamilton           | Michael Kohanski      | William Mauermann      |
| Brian Brewer            | RayAnn DuBose          | Denise Hamlin          | Joshua Kollars        | Rodney McCarver        |
| Brandon Brooks          | Danielle Dugan         | Shane Hamon            | Matthew Kolz          | Michael McCeney        |
| Adam Brown              | Vikash Dugar           | Michael Haney          | Loren Korenge         | Dennis McCoy           |
| Michelle Browne         | Roger Duggan           | Aaron Hansen           | Henry Korzeniowski    | Shana McDaniel         |
| David Bruck             | Lorena Dumas-Guntner   | Amy Hansen             | Eugene Koshkin        | Neil McDonald          |
| Chad Brummett           | Pamela Durning         | Davina Harkey          | Jonathan Kozinn       | Tobin McGowen          |

## New Diplomates, American Board of Anesthesiology®, Fall 2007 (continued)

|                       |                       |                          |                        |                    |
|-----------------------|-----------------------|--------------------------|------------------------|--------------------|
| Tory McGrath          | Joseph Oxendine       | Wendy Ren                | Jose Soliz             | Srilatha Vodur     |
| Esther McKenzie       | Shanis Padgett        | Leonid Reyfman           | Tamara Sologub         | Kevin Vogeley      |
| Matthew McLaren       | Julio Paez            | Justin Reynolds          | Bonnie Song            | Kevin Vorenkamp    |
| Blaise McLaughlin     | Samata Paidy          | James Richardson         | Monika Soni            | Loan Vu            |
| Robert McRae          | Jorge Palacios        | Melvin Richardson        | Patrick Soran          | John Vullo         |
| Mauricio Mejia        | Alexander Paloma      | Emmanuel Riconalla       | Lisa Soranno           | Tamim Wafa         |
| Daniel Mekasha        | Andy Pandya           | Christopher Robards      | Spiro Spanakis         | John Wages         |
| Ryan Melcher          | Stephen Paquelet      | Christopher Robert       | Shantanu Srinivasan    | Tacee Walker       |
| M Stephen Melton      | Edward Park           | Courtney Roberts         | Kristen Stadlander     | Matthew Wallace    |
| Justin Meschler       | Kenneth Park          | Kimberly Roberts         | Chris Stasny           | Cong Wang          |
| Amir Mian             | Edward Parker         | William Roberts          | Brent Stewart          | Jim Waring         |
| Mauricio Michaels     | Samuel Parks          | Amy Robertson            | John Storheim, Jr.     | Michael Warrick    |
| Kimberly Milhoan      | James Parmele         | Francisco Rodriguez      | Chadwick Strain        | Darrell Webb       |
| James Miller          | George Pasvankas      | Cesar Rodriguez Diaz     | Jeffrey Stuart         | Zongjie Wei        |
| Jason Miller          | Valerie Pate          | Sandra Rodriguez-Rosario | Peter John Stubbs      | Lawrence Weinstein |
| Meredith Miller       | Achit Patel           | Laura Roland             | James Stump            | Cynthia Weller     |
| Ryan Miller           | Amish Patel           | Mabel Romero             | Mary Stuppy            | Barbi Wells        |
| Jennifer Mogan        | Beejal Patel          | Christopher Romig        | Ryan Surgeon           | Mark Wesley        |
| Meraj Mohiuddin       | Biraj Patel           | Nader Ronaghi            | James Sullivan         | Susan Wetstone     |
| Jama Mohmoud          | Chirag Patel          | Ryan Roney               | William Sumrall, III   | Catherine Whang    |
| Leander Moncur        | Parag Patel           | Frank Rosemeier          | Venkatesh Sundararajan | Robert Whelan      |
| Sovietsky Moreta      | Prashant Patel        | David Rosenblum          | Matthew Sunderlin      | Jeffery White      |
| Douglas Morgan        | Ann Pattin            | Anna Rosenfeld           | Preetham Suresh        | Bryan Wichman      |
| Samuel Morgos         | Benjamin Paul         | Ronald Rubin             | Sanjay Sutaria         | Amy Wilborn        |
| Gregory Morrissette   | Rostislav Pavlik      | Scott Rudy               | Jason Sweeney          | Troy Wildes        |
| Matthew Mosura        | Bojan Pavlovic        | Wanda Ruiz Morales       | Matthew Swift          | Danny Wilkerson    |
| Amy Mouat             | Erik Payne            | Brian Rupert             | Elod Szabo             | Karen Wilkins      |
| Genevieve Mounce      | Rachel Perez-Franco   | Michael Rus              | Magdy Takla            | Adrienne Williams  |
| John Mrachek          | James Peterman, Jr.   | Iolanda Russo-Menna      | Pravin Taneja          | Rex Williams       |
| Medea Mshvildadze     | Lynda Peterman        | Freddy Salgado           | Wyndee Tarter          | Heath Wills        |
| Martin Mueller        | Minh Pham             | Suleiman Salman          | Geoffrey Taylor        | Shurea Wilson      |
| Krishna Mukkamala     | Thomas Phillips, Jr.  | Mandy Sander-Prather     | Dmitriy Tckachenko     | Travis Wilson      |
| Simon Murphy, Jr.     | Tyler Phillips        | Sukhjit Sandhu           | Maria Tebbetts         | Jason Wimberly     |
| Timothy Murphy        | Michael Picone        | Thomas Sanneman          | Michael Tevosian       | Heidi Witherell    |
| Khaleah Myers         | Marcel Pidoux         | Rebecca Santillan        | Jeremy Theiss          | Megan Wollan       |
| Christine Myo         | Carl Pileri           | Monica Sanz              | George Thomas          | Adam Wolpert       |
| Pamela Nagle          | Frank Podojil         | Winston Saulon           | Robert Thompson        | Jeffrey Wolszczak  |
| David Nagy            | Jason Pollard         | Eric Saunders            | Matthew Thorson        | Joseph Woods       |
| Anand Narayanappa     | Sandra Poppell        | Peter Savard             | Philomina Thuruthumaly | Jason Workman      |
| Nahla Nasser          | Lucia Povor           | Paul Schaefer            | Huy Tieu               | Crystal Wright     |
| Todd Nelson           | Sipong Prakkalapakorn | Ryan Schellpfeffer       | Joseph Ting            | Olson Wu           |
| Troy Nesbit           | Christopher Prater    | Rolf Schlichter          | William Tisdall        | Po-chin Wu         |
| Ryan Ness             | Eric Price            | Todd Schmidt             | Bernardo Tisminezky    | Tanzhen Wu         |
| Krystof Neumann       | M. Prieto             | Kai Schoenhage           | Anil Tiwari            | Tzuhao Wu          |
| Lemuel Newton         | Claudene Pritchard    | Rebekah Scotch           | Justin Tobias          | Brett Wurth        |
| Bao Nguyen            | Danica Pruett         | Anthony Scurria          | Maria Tomeldan         | Kamie Yang         |
| Canh Nguyen           | Olena Pryjdun         | Gregory Seaman           | Derek Tomes            | Christopher Yarber |
| Hoang Nguyen          | Anne Ptaszynski       | Surjya Sen               | Kevin Tomfohrde        | William Yates      |
| Huy Nguyen            | Jennifer Pugh         | Devang Shah              | David Tonkin           | Peter Yeh          |
| Tri Nguyen            | Juan Pulido           | Noreen Shahbaz           | Eric Torbert           | Richard Yeh        |
| Alina Nicoara         | Uplekh Purewal        | Susanne Shamsolkottabi   | Devin Trousdale        | Aaron Yezbick      |
| Lynn Nieman           | Aliaksei Pustavoitau  | Jacky Shannon            | John Trummel           | Kae Yi             |
| Larry Nixon, Jr.      | Li Qin                | Vivek Sharma             | Mitchell Tsai          | Erik Youmans       |
| Debra Nordmeyer       | Amy Qualey            | Leon Shaw                | Pacifico Tuason        | William Young      |
| Katherine Normand     | Homer Radden          | Sanaa Shehata            | Anthony Tucker         | Cynthia Yuan       |
| Christina Noyes       | O. Raffo              | Meeta Sheth              | Hakan Tunca            | Jeng Yuh           |
| Chris Nunn            | Shannon Rainey        | Robert Shih              | Luminita Tureanu       | Gary Zane          |
| Michael O'Neil        | Durre Raja            | Ahmad Shiktholth         | Todd Turley            | Zachary Zanolwiak  |
| Richard Oeser         | Vimala Ramesh         | Matthew Shiveley         | Cannon Turner          | Victoria Zavala    |
| Oddur Olafsson        | Jose Ramos            | M. Siddiqui              | Judi Turner            | Jeffrey Zavaleta   |
| George Olechowski     | Jamie Ramsay          | Rehan Siddiqui           | Mark Twite             | Mohamed Zawahir    |
| James Oleksa, III     | Bradford Ramsey       | Shazia Siddiqui          | Gregory Umphrey        | Afshin Zeighami    |
| Namik Oliva           | Suma Ramzan           | Jeffrey Simmons          | Benjamin Unger         | Alexander Zenzick  |
| Ali Oloomi            | Sanjay Rao            | Daniel Simula            | Jai Uttam              | Ruimin Zhang       |
| Timothy Olson         | Sudhir Rao            | Nina Singh               | David Van Dam          | Jie Zhou           |
| Yo-Hang Ong           | Neeru Rattan          | David Sinofsky           | Bruce Van Dop          | Shao Feng Zhou     |
| Cherian Oommen        | Jacob Rauchwerger     | Jeffrey Small            | Kenneth Van Dyke, Jr.  | Samuel Ziegler     |
| Julie Oppenheimer     | Tara Reagan           | Carolina Smith           | Cindy Van Praag        | Andrew Zurovec     |
| Achikam Oren-Grinberg | Matthew Reda          | Myrka Smith              | Zoard Vasarhelyi       |                    |
| Jaime Ortiz           | Malini Reddy          | Paul Smith               | Samuel Velez           |                    |
| Jamie Ostarchvic      | Shamantha Reddy       | Timothy Smith            | Janice Victor          |                    |
| Wen-Hui Ou            | Edwin Regen           | Sarah Smolik             | Lucia Vigna            |                    |
